# Supplementary material for: Genome-wide association study and genomic selection for tolerance of soybean biomass to soybean cyst nematode infestation
Source: PLoS One. 2020 Jul 16;15(7):e0235089. doi: 10.1371/journal.pone.0235089 (PMC7365597; doi:10.1371/journal.pone.0235089)
Supplement: S1 Table — (XLSX) [file pone.0235089.s001.xlsx]

## Sheet: TableS1
S1 Table. List of soybean genotypes evaluated for tolerance to SCN, average adjusted tolerance index based on biomass reduction under SCN infestation, and standard deviation.
Line_name	Average adjusted tolerance index	Standard deviation
ACME	63.1019	8.5004
AJMA	74.6897	14.6126
ALPHA	118.164	12.5513
ALTONA	101.289	9.29138
AMSOY	64.1077	14.6645
ARCHER	53.8109	13.5063
BEESON	70.4182	10.28
BERT	49.1674	18.9196
BLACKKATO	56.9829	7.94494
MN1802SP	69.4182	18.3164
BURLISON	69.0679	10.4488
CAPITAL	60.9925	17.0902
CENTURYL2	63.8109	3.72976
CHICO	58.8845	11.8261
CHIPPEWA64	79.1101	24.7917
CLAY	56.4948	11.627
DWIGHT	74.1089	14.6768
FREEBORN	83.5743	24.9913
GLENWOOD	66.4159	17.6288
GRANDE	98.6801	11.3359
GRANITE	53.8918	29.6147
GRANT	76.1767	4.56067
HARK	65.8806	3.71883
HAWKEYE	62.4485	6.56826
HODGSON78	40.3864	8.65678
JACK	70.7774	26.3917
JIM	56.4634	7.15621
KASOTA	54.534	8.23314
KATO	56.9703	6.67018
LAMBERT	70.5437	18.3766
LESLIE	48.9361	16.7475
MN0606CN	52.237	18.6823
M94246028	44.44	10.6005
M94275024	56.1942	11.6192
M94278001	35.1125	4.70139
M94283002	54.4951	6.39068
M95101005	57.1566	19.3941
M95116024	80.7474	9.81467
M95118009	68.0905	22.8286
M95123006	47.2827	5.85743
M95123023	55.9979	17.3218
M95123116	56.355	16.0623
M95202018	56.2647	21.0733
M95211102	51.5393	14.3532
M95215050	51.0881	9.25837
M95227016	34.5011	23.7366
M95228092	31.8825	6.87358
M95255017	54.4749	7.55657
M95261096	56.1571	10.0508
M95265118	38.6412	16.3006
M95273031	63.8517	12.4975
M95273035	66.6088	25.1796
M95274064	44.2321	10.1658
M95274114	33.6253	7.80255
M95274129	32.155	12.138
M95274132	47.4169	3.31947
M95275008	74.4053	28.7999
M95278022	44.586	29.724
M95284113	54.6066	14.6875
M95287075	40.7537	17.2328
M95295108	49.1136	14.038
M96140012	55.8692	18.6453
M96356055	55.2765	30.2485
M96356062	70.1042	4.32625
MN1010	65.1274	17.485
M96393101	78.1915	6.2322
M96403029	66.047	16.6439
M96412098	77.641	23.0501
M96414071	77.3464	23.5847
M96414121	81.8066	21.9727
M96417038	86.9793	18.1558
M96417149	93.4294	24.0917
M96452022	92.1714	22.4396
M96452057	75.9406	22.2784
M96452059	58.6558	10.7985
M96452061	69.0685	11.4409
M96521075	90.3863	25.2964
M96745056	59.3051	20.2074
M97101025	54.294	12.7371
M97101088	59.0036	7.46037
M97115063	67.9824	22.0002
M97120001	55.1192	10.9361
M97121119	62.1295	15.4097
M97158083	59.6848	7.10715
M97159146	63.6495	12.7958
M97164239	61.4232	8.87692
M97201070	58.3428	11.1924
MN1104SP	84.0654	11.7257
M97204114	72.8709	31.235
M97205062	71.3378	35.3067
M97205082	85.2403	21.3714
M97205091	83.5239	22.7744
M97205096	110.546	16.9505
M97205097	70.7037	23.5056
M97206036	77.2458	25.1758
M97207045	68.631	14.5568
M97207052	94.217	17.5966
MN1105SP	87.5073	22.7512
M97209054	82.7413	28.9268
M97209075	94.2414	23.8189
M97251029	99.7036	24.9848
M97302004	55.5603	10.774
M97302128	85.3414	24.8246
M97304052	106.7	30.1038
M97305077	104.354	27.6127
MN1307	84.2406	29.0054
MN0101	91.9502	19.5516
M98103039	61.8741	15.5374
MN1804CN	102.368	29.508
MN1106CN	61.5739	2.11705
MN0107	70.8072	24.0722
MN1410	63.8005	23.8191
M98234042	82.8625	14.8775
MN1011CN	82.275	22.6354
M98238010	69.8344	18.1688
M98239080	76.5871	18.891
M98239263	57.7004	20.3041
M98240104	72.548	21.4309
MN0502	51.2788	23.4893
M98278072	42.9465	15.2754
M98279014	67.7401	18.1754
M98283046	68.8564	14.5981
MN0906SP	55.8116	15.1137
MN0102SP	55.9609	11.2653
MN0082SP	22.8653	11.21
MN0603SP	43.3357	25.6714
MN0501SP	64.1014	20.4114
M98308007	53.9057	14.2173
M98308016	63.1342	16.7719
MN1308SP	48.4016	8.68436
M98310021	67.689	16.9902
M98310066	59.488	9.22929
M98310069	39.5991	18.7305
M98315056	60.8782	15.359
M98324017	60.9044	27.2602
MN1202SP	62.0315	17.9651
M98324060	84.9013	31.2351
M98331009	49.7376	11.5934
M98332108	111.857	4.31106
M99103172	72.0938	24.0927
M99113005	97.5922	11.9476
M99113168	69.4623	4.80865
M99118059	72.6421	9.80756
M99121030	51.1964	17.9235
M99204037	58.6824	18.9262
M99209070	58.2605	15.9891
M99230063	48.6028	20.8748
M99246068	40.7875	8.5218
M99248011	54.647	19.4568
M99255012	65.0678	27.4345
M99255036	72.4749	27.8432
M99274166	66.1327	18.0098
M99278133	53.6052	19.1653
M99278137	59.0573	6.18634
M99286047	80.4561	29.9862
M99286050	67.0932	16.5082
M99286149	64.8806	16.4475
M99302003	68.2542	28.6996
M99313054	39.9426	15.1942
MN0207SP	63.5328	20.9948
M99326040	41.4611	14.3659
M99327049	59.6675	17.9605
M99329038	56.344	21.7889
MN1412SP	45.6156	9.12643
M99334034	75.2512	11.74
M99334078	51.0521	8.04188
M99337034	62.7003	9.69076
MN0804SP	55.683	19.8155
M99340047	45.0964	15.1858
MN1505SP	55.8611	16.0651
M99341005	60.4519	24.6718
M99341028	47.3002	4.34653
M99386097	61.2071	14.1201
MAPLEGLEN	72.2276	14.1306
MAPLERIDGE	53.8645	12.7696
MCCALL	76.7854	4.28901
MERIT	73.6966	14.4879
MN0081	53.3594	9.656
MN0091	57.6332	14.384
MN0092	43.9638	7.17854
MN0095	83.5159	18.0322
MN0103SP	51.4299	7.42087
MN0201	55.8366	15.9154
MN0203SP	78.4127	15.1356
MN0205SP	41.3097	11.1016
MN0301	67.9642	18.6387
MN0805SP	39.515	16.8571
MN1003SP	55.4031	19.0328
MN1007SP	43.699	23.4795
MN1008SP	63.908	21.9598
MN1101SP	67.0353	25.9337
MN1305SP	60.4951	17.923
MN1307SP	76.1048	16.1712
MN1406SP	60.2316	17.5216
MN1407SP	72.0288	32.5695
MN1409SP	60.8077	15.0783
MN1603SP	76.8244	20.4555
MN1607SP	78.0864	10.727
MN1805SP	75.0303	20.4262
MN1806SP	117.88	24.2577
PETERSON85	67.785	36.8041
PI227565	57.8875	32.227
PI257428	43.8556	10.4102
PI347550B	43.6408	8.90806
PI372403A	39.0031	15.8716
PI437228	45.4621	24.3672
PI437267	30.1034	13.3646
PI437296	66.3604	30.2343
PI437994	69.4721	21.3942
PI445799	27.4928	13.1407
PORTAGE	35.7269	16.2157
PRIDEB216	30.5008	11.5423
PROTO	54.3526	13.582
SIMPSON	63.2491	19.5218
STRIDE	60.4523	5.00188
STURDY	73.5195	11.5343
SURGE	65.594	12.63
SWIFT	89.8605	18.1297
VINTON81	65.6225	29.5977
WALSH	76.5872	18.5514
WEBER	76.7405	33.1914
L147	48.877	17.1856
L151	83.9351	24.6626
L237	32.4305	21.6333
L238	65.3335	31.0947
L244	70.681	15.8653
L247	54.5164	32.3898
L250	36.8887	24.469
L251	63.0557	28.7346
L252	47.253	31.8842
L259	59.45	1.40997
L261	73.0549	15.5198
L262	84.4368	23.4428
L269	60.4964	28.1133
